# Supplementary material for: Revealing Eu3+-doped yttrium pyrogermanate as a soft UV excitable phosphor: retaining the pros of the commercial phosphor and compensating for the cons
Source: Royal Society of Chemistry journal article supplement (doi:10.1039/d2nj03374g), 2022-01-01
Supplement: d2nj03374g1.pdf [file d2nj03374g1.pdf]

## Revealing $\text{Eu}^{3+}$ -doped Yttrium pyrogermanate as soft UV excitable phosphor: Retains Pros of commercial phosphor and compensates for Cons

**Adish Tyagi<sup>1,2</sup>, Sandeep Nigam\*<sup>1,2</sup>, B. G. Vats<sup>3</sup>, V. Sudarsan<sup>1,2</sup>, C. Majumder<sup>1,2</sup>, R. Kaiwart<sup>4</sup>, H. K. Poswal<sup>4</sup>, Jagannath<sup>5</sup>, A. K. Tyagi<sup>1,2</sup>**

<sup>1</sup>Chemistry Division, Bhabha Atomic Research Center, Mumbai, 400 085 INDIA.

<sup>2</sup>Homi Bhabha National Institute (HBNI), Mumbai, 400 094, INDIA

<sup>3</sup>Fuel Chemistry Division, Bhabha Atomic Research Center, Mumbai, 400 085 INDIA

<sup>4</sup>High Pressure and Synchrotron Radiation Physics Division, Bhabha Atomic Research Center, Mumbai, 400 085 INDIA

<sup>5</sup>Technical Physics Division, Bhabha Atomic Research Center, Mumbai, 400 085 INDIA.

### Supporting Information

#### Experimental and computational detail:

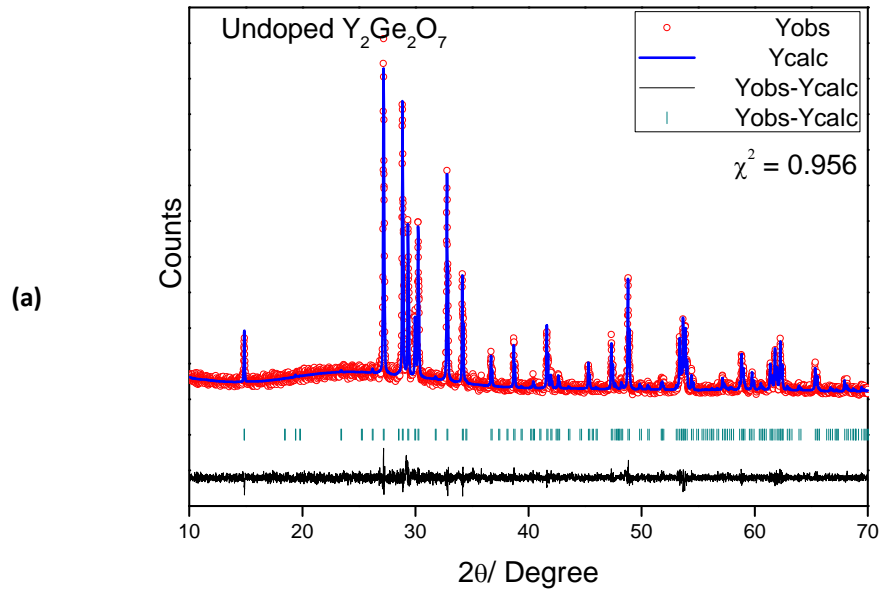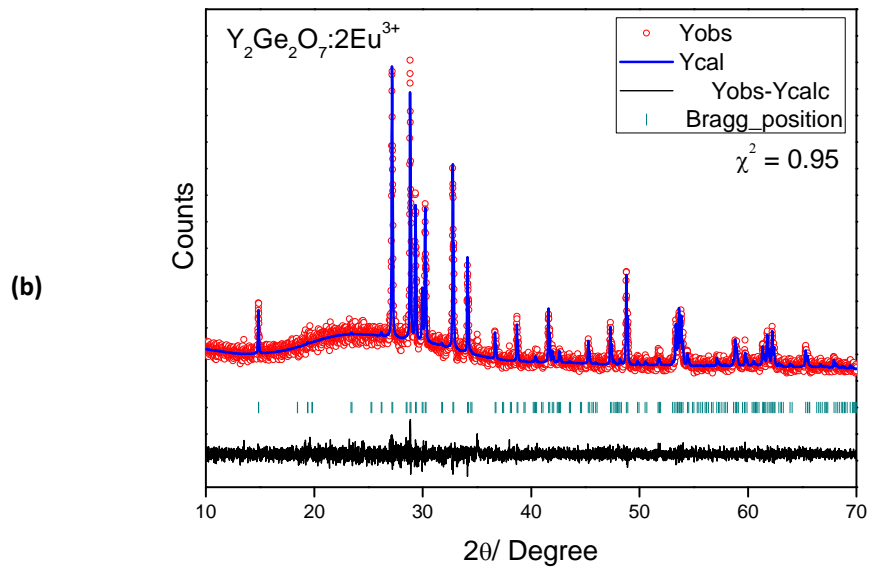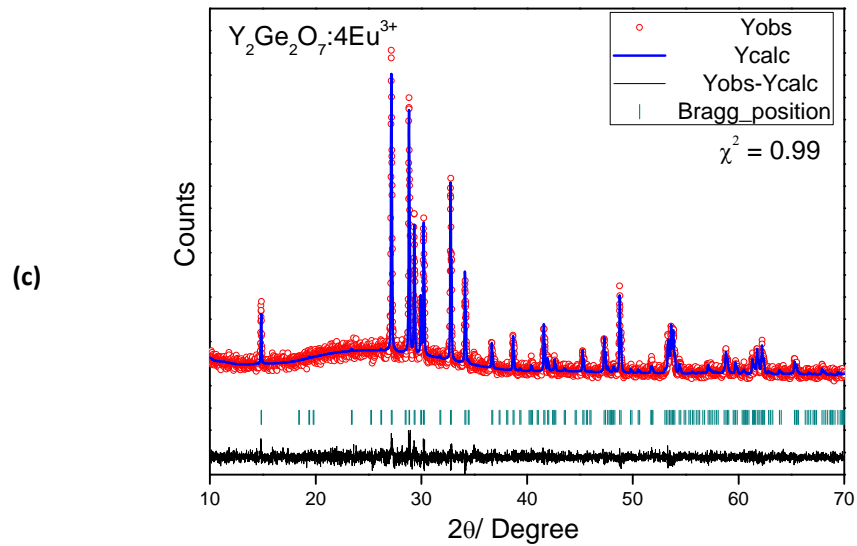

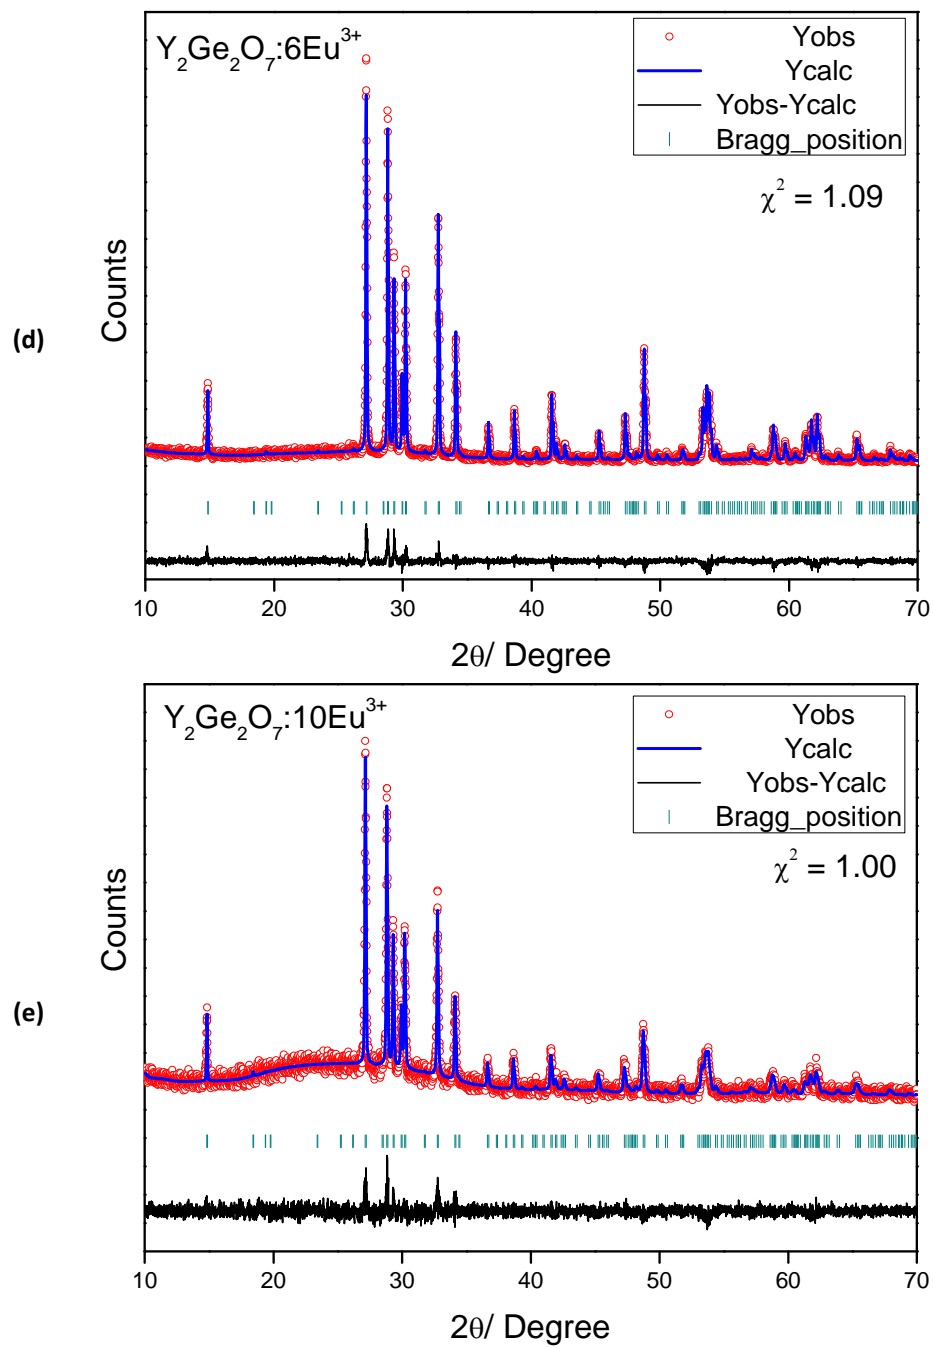

Figure-S1: XRD Pattern and respective Rietveld Refinement of  $\text{Y}_2\text{Ge}_2\text{O}_7$ : Eu samples with varying Eu concentration

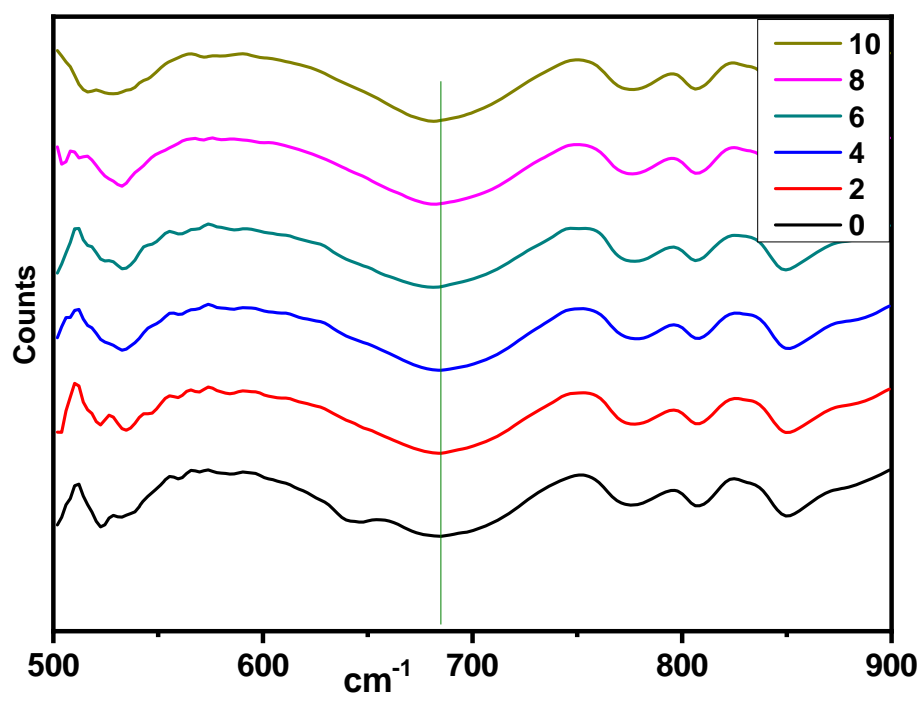

Figure-S2: FTIR spectrum of undoped and Eu-doped Y<sub>2</sub>Ge<sub>2</sub>O<sub>7</sub>.

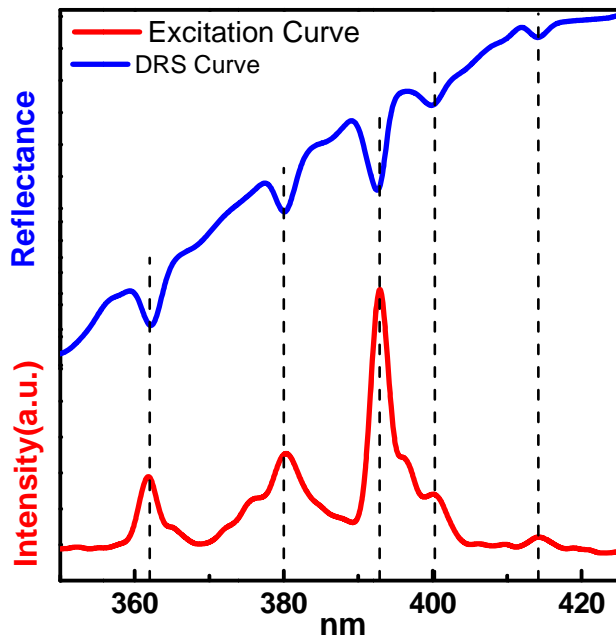

Figure-S3: Coherence of Diffuse Reflectance spectra (DRS) and excitation spectra of  $Y_2Ge_2O_7:Eu$ .

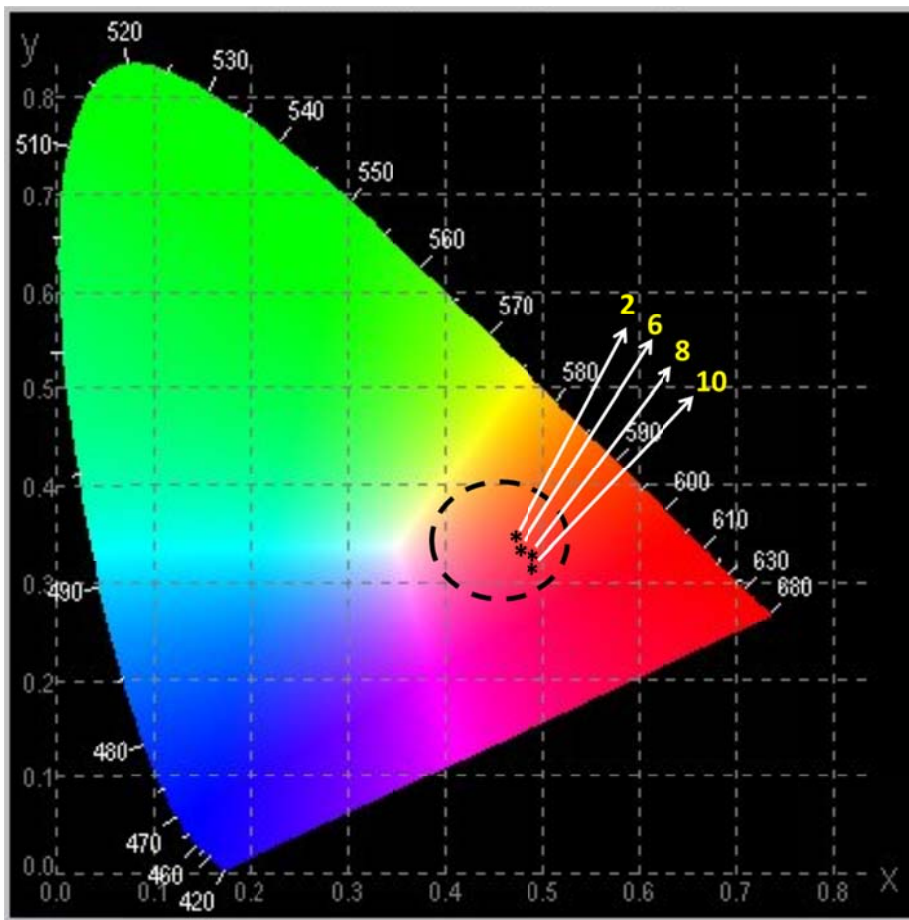

Figure-S4: CIE Chromaticity Diagram of  $Y_2Ge_2O_7:Eu$  phosphor with different Eu-content.

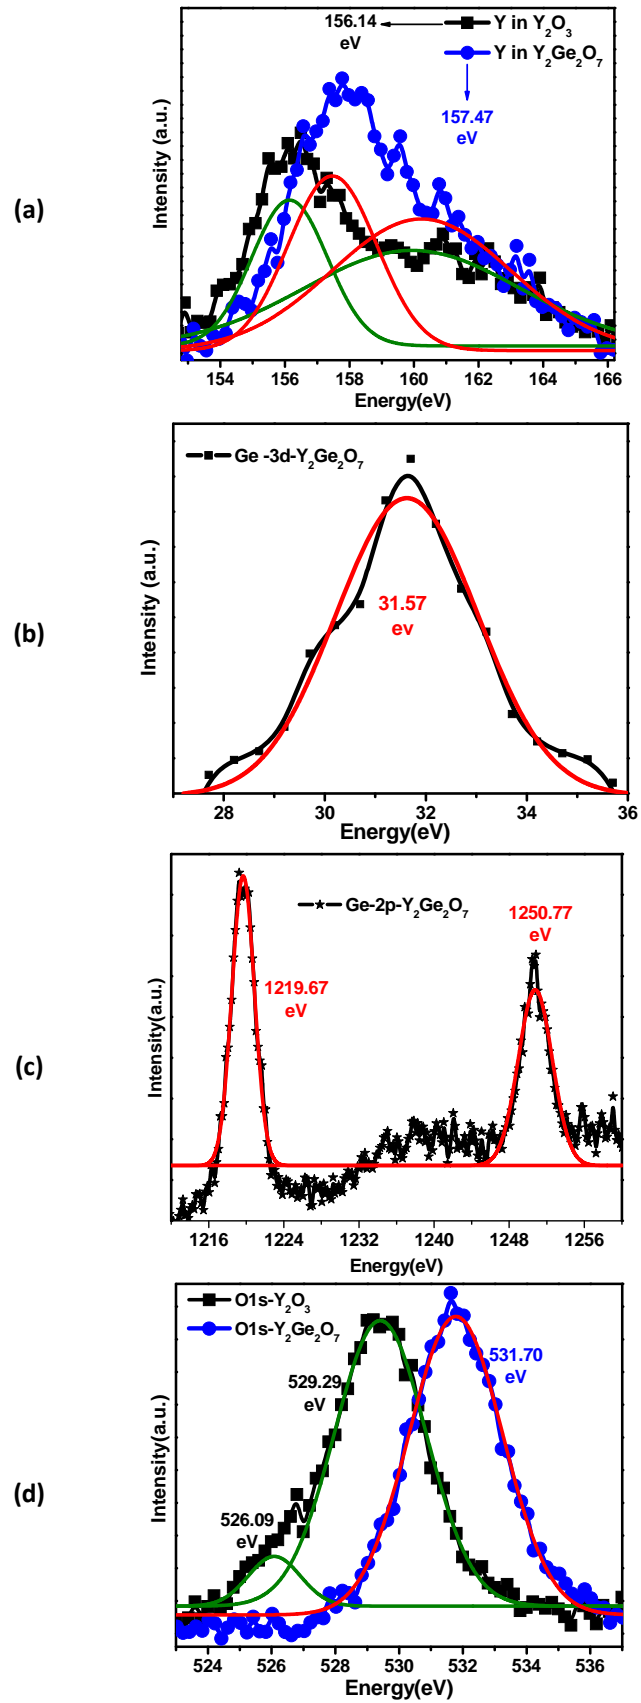

Figure-S5: XPS of  $Y_2O_3:Eu$  and  $Y_2Ge_2O_7:Eu$  samples ( 2%Eu).

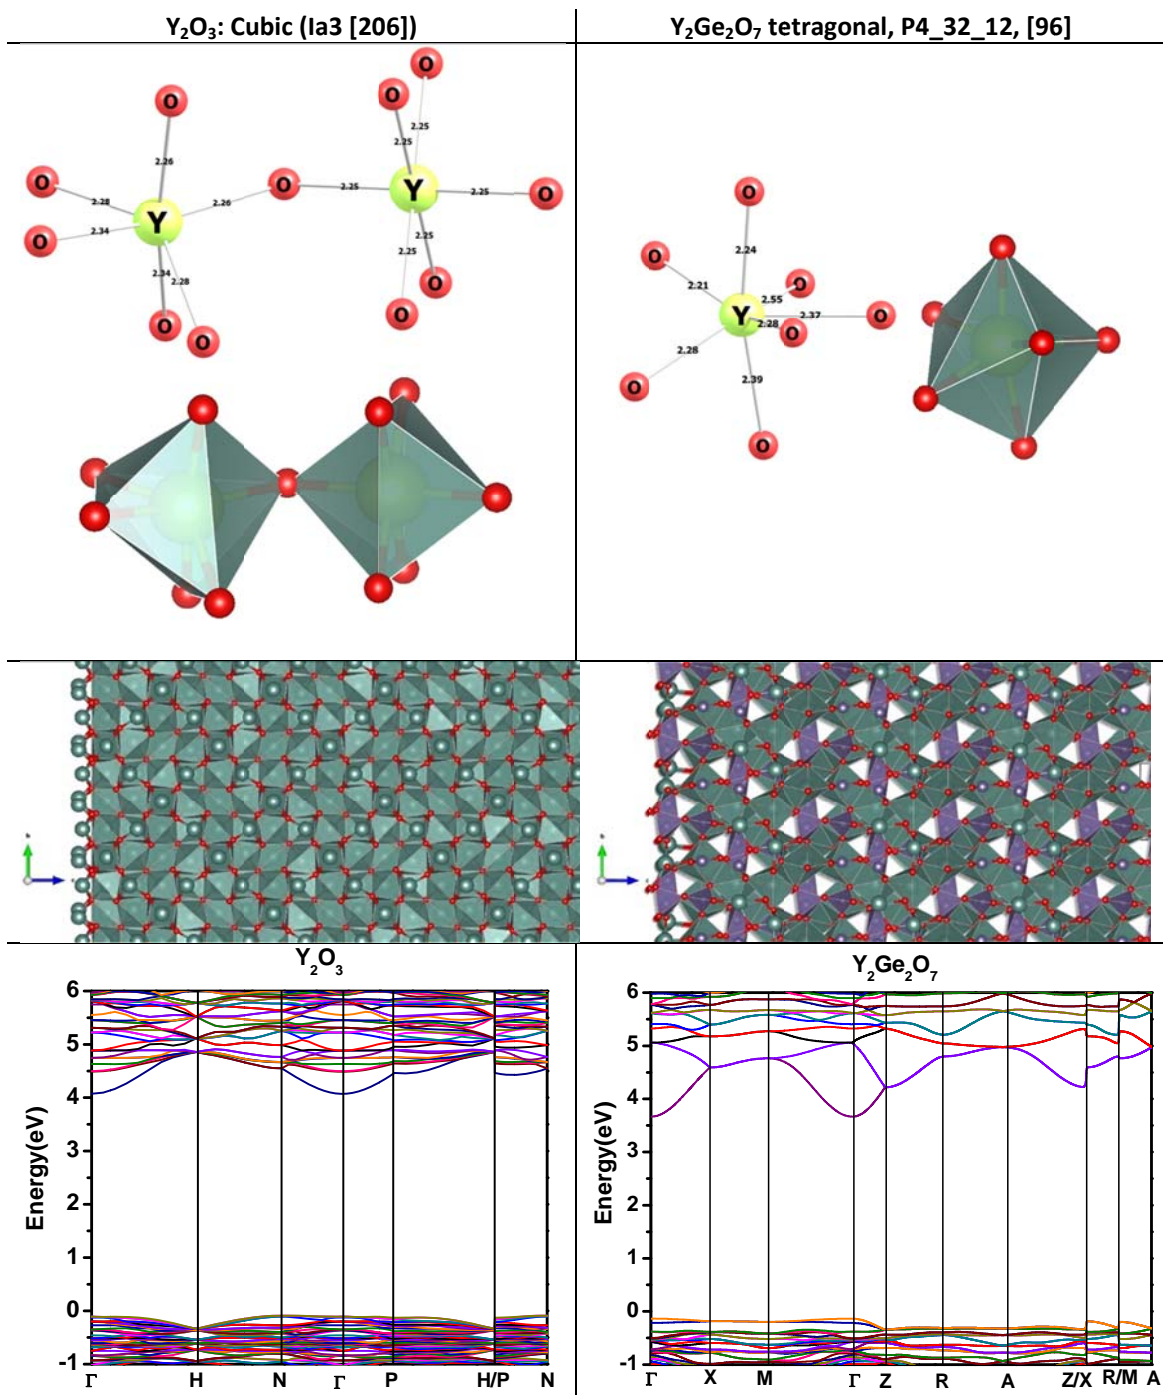

Figure-S6: Comparison of geometry and electronic structure of  $Y_2O_3$  and  $Y_2Ge_2O_7$ .

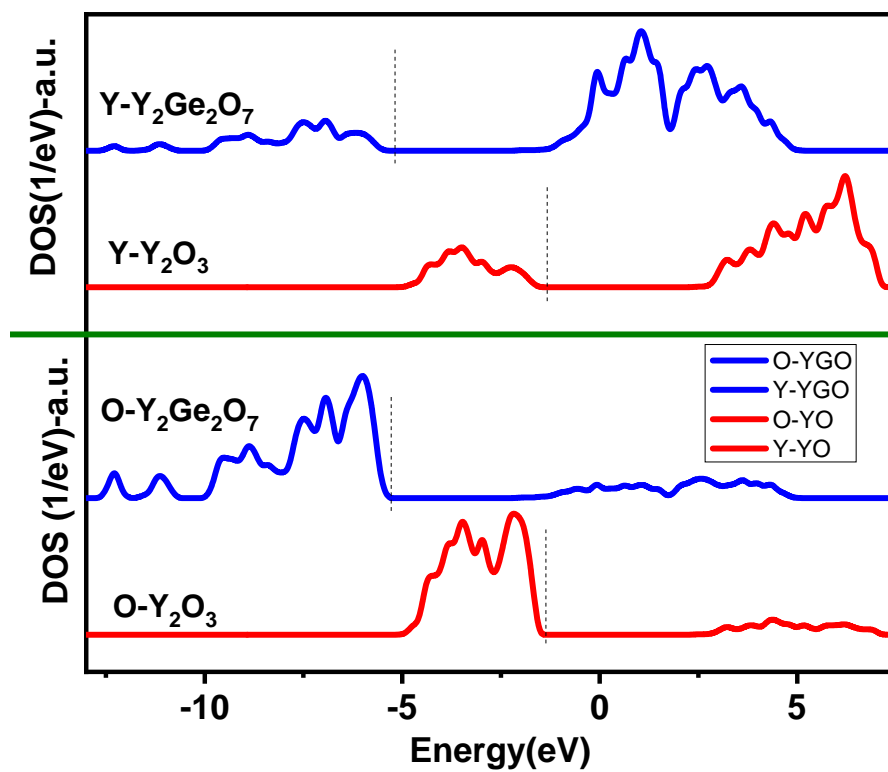

**Figure-S7:** Comparison of projected density of states of  $Y_2O_3$  and  $Y_2Ge_2O_7$ . The vertical line indicates the Fermi level



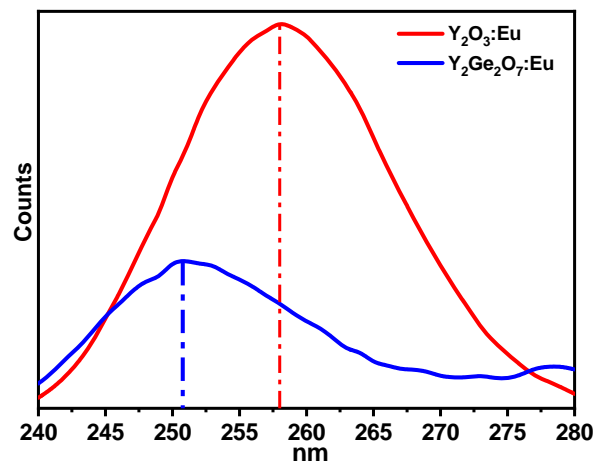

Figure-S8: Comparison of charge transfer band of  $Y_2Ge_2O_7:Eu$  and  $Y_2O_3:Eu$  phosphor.

# 1. Experimental and computational details section

## Materials and methods

GeO<sub>2</sub>, Y<sub>2</sub>O<sub>3</sub> and Eu<sub>2</sub>O<sub>3</sub> were obtained from Analytical Reagent grade, SD Fine Chemicals, Mumbai, India and were used as received. Powder XRD data of the samples was recorded using Cu K $\alpha$  ( $\lambda = 1.5405 \text{ \AA}$ ) using monochromatic X-ray source of a Rigaku Miniflex-600 diffractometer. The pattern of the samples was recorded in the range of 10-70° (2 $\theta$ ) in continuous mode. Fourier transformed infrared (FTIR) spectra were recorded with a resolution of 2 cm<sup>-1</sup> for thin pellets of the samples made in KBr matrix on a Bomem MB102 FTIR spectrometer. All the luminescence measurements were carried out at room temperature on an Edinburgh Instruments' FLSP 920 system, having a 450W Xe lamp and a micro-second flash lamp (60W) as excitation sources. Red sensitive PMT was used as the detector. Approximately 20mg of compound was mixed with few drops of methanol and the resulting slurry was spread over a glass plate. This was dried under ambient conditions and used for luminescence measurements. All emission spectra were corrected for detector response and excitation spectra for the lamp profile. Raman scattering experiment have been performed on Jobin Yvon triple-stage T64000 Raman spectrometer in a back-scattering geometry coupled with charge couple device (CCD) detector in single mode configuration. For Raman signal excitation, He-Ne laser of wavelength 632.8 are used. Raman modes have been collected with 20x object lens, which are dispersed by grating of density 1800 grooves/mm in the range of 100-1000 cm<sup>-1</sup>. The resolution of the system with this configuration is < 4 cm<sup>-1</sup>. XPS analysis on the samples were performed at 4064 eV photon energy on the PES-BL14 beamline (BARC) at Indus-2, RRCAT, Indore.

## Synthesis

Y<sub>2-x</sub>Ge<sub>2</sub>O<sub>7</sub>:xEu<sup>3+</sup> (x = 0, 0.02, 0.04, 0.06, 0.08, 0.10, 0.15, 0.20) samples were prepared through high temperature solid state route. For this stoichiometric amount of Y<sub>2</sub>O<sub>3</sub> (Merck, 99.99%) GeO<sub>2</sub> (Merck,  $\geq 99.99\%$ ) and Eu<sub>2</sub>O<sub>3</sub> (Merck, 99.9%) were well mixed and then heated at 1300 °C for 8 hours in air. After cooling to the ambient temperature, all the samples were ground into powder for further measurements.

## Computational Details:

All calculations were carried out using the spin-polarized DFT with a plane wave basis set, implemented in the Vienna Ab-initio Simulation Package (VASP)<sup>1-2</sup>. The electron-ion interactions were described by the projector augmented wave (PAW) method<sup>3</sup>. PAW pseudo potentials generated using with scalar relativistic corrections are used<sup>4</sup>. The spin polarized generalized gradient approximation using the Perdew-Burke-Ernzerhof (PBE) functional<sup>5</sup> has been used to calculate the exchange-correlation energy. The cut off energy for the plane wave basis set was fixed at 400 eV for

all calculations performed in this study. The geometry optimization was performed by ionic relaxation, using a conjugate gradient minimization. The geometries are considered to be converged when the force on each ion becomes 0.01eV/ Å or less. The total energy convergence was tested with respect to the plane-wave basis set size and simulation cell size, and the total energy was found to be accurate to within 1 meV. A Monkhorst-Pack k-point grid of 6 x 6 x 6 was employed to map the first Brillouin zone.

Three-dimensional periodic boundary conditions were applied to approximate a bulk solid. Conventional tetragonal unit cell containing 44 atoms (8 Y, 8 Ge, 28 O) were used for calculations. Structural optimization was performed with respect to atomic coordinates and unit-cell parameters. The calculated lattice parameter ( $a=b=6.883$  Å  $c=12.348$  Å;  $\alpha=\beta=\gamma=90^\circ$ ) and structural parameter are in excellent agreement with the reported experimental values<sup>6</sup>. The simulated XRD pattern of DFT structure of  $Y_2Ge_2O_7$  also matches very well with experimental counterpart. The calculation for  $Y_2O_3$  was carried out using unit cell having 64 atoms (32Y, 48O). The calculated lattice parameters ( $a=10.614$  Å;  $\alpha=\beta=\gamma=90^\circ$ ). The for Eu-doping in  $Y_2Ge_2O_7$  and  $Y_2O_3$ , one yttrium atom from the unit cell was replaced with europium. The total magnetic moment of the unit cell was found to be six belonging to  $4f^6$  configuration of  $Eu^{3+}$ .

**$\Omega_\lambda$ , where  $\lambda = 2$  and  $4$  Parameter and quantum efficiency calculation:**

In the present study,  $\Omega_\lambda$  values have been calculated by considering the  ${}^5D_0 \rightarrow {}^7F_1$  transition as the reference<sup>7</sup>. Emission intensity can be expressed by the relation  $I = N \hbar \omega A$ , where, N is the population of the emitting level ( ${}^5D_0$ ),  $\hbar \omega$  is the transition energy and A is the Einstein's coefficient of spontaneous emission.<sup>8,9</sup> The terms "A" and  $\Omega_\lambda$  are related through the following expression (equation 1)

$$A_{0-\lambda} = \frac{64\pi^4 \nu^3 e^2}{3hc^3} \frac{1}{4\pi\epsilon_0} \chi \sum_{\lambda} \Omega_{\lambda} \langle {}^5D_0 \| U^{\lambda} \| {}^7F_J \rangle^2 \quad \dots(1)$$

Where " $\nu$ " is the frequency, " $h$ " is the Plank's constant, " $e$ " is the charge of the electron, " $1/4\pi\epsilon_0$ " is a constant and is equal to  $8.99 \times 10^9$  Nm<sup>2</sup>/C<sup>2</sup>, " $\chi$ " is Lorents field correction and is equal to  $n_0(n_0^2+2)^2/9$ , where  $n_0$  is the refractive index of the material. The value of refractive index is taken as 1.78 and is obtained by taking the average value of the refractive indices corresponding to  $GeO_2$  and  $Y_2O_3$  phases.<sup>19</sup> The term  $\langle {}^5D_0 \| U^{\lambda} \| {}^7F_J \rangle^2$  is the square of the reduced matrix elements. The values of  $\langle {}^5D_0 \| U^2 \| {}^7F_2 \rangle^2$  and  $\langle {}^5D_0 \| U^4 \| {}^7F_4 \rangle^2$  are taken as 0.0032 and 0.0023, respectively<sup>10</sup>. The values of the spontaneous emission cross-section is calculated from the emission spectrum using the relation  $A_{0-\lambda} = (\nu_{0-1} / \nu_{0-\lambda}) (I_{0-\lambda} / I_{0-1}) A_{0-1}$ ,<sup>8,11</sup> where  $\nu_{0-\lambda}$  and  $I_{0-\lambda}$  represent respectively the frequency and intensity corresponding to the respective transition in the emission spectrum.  $A_{0-1}$  is taken as a constant<sup>10</sup> and

is equal to  $50 \text{ s}^{-1}$ . As the matrix elements  $U^{(4)}$ ,  $U^{(6)}$  and  $U^{(2)}$ ,  $U^{(6)}$  for the  ${}^5D_0 \rightarrow {}^7F_2$  and  ${}^5D_0 \rightarrow {}^7F_4$  transitions, respectively are very small (negligible), the values of  $\Omega_2$  and  $\Omega_4$  can be calculated from equation 1 by determining  $A_{0-\lambda}$  directly from the emission spectrum.

The quantum efficiency values are calculated by taking the ratio of radiative decay rates and total (radiative + non-radiative) decay rates. Emission quantum efficiency [ $\eta = A_{\text{rad}} / (A_{\text{rad}} + A_{\text{nrad}})$ ].

The radiative decay rate ( $A_{\text{rad}}$ ) is calculated by summing of all the spontaneous emission cross-section ( $A_{0-\lambda}$ ) values,  $\lambda = 0, 1, 2, 3, 4$ . For example  $A_{0-2}$  and  $A_{0-4}$  corresponds to spontaneous emission cross-section for the  ${}^5D_0 \rightarrow {}^7F_2$  and  ${}^5D_0 \rightarrow {}^7F_4$  transitions. The values of the spontaneous emission cross-section is calculated from the emission spectrum using the relation  $A_{0-\lambda} = (\nu_{0-1} / \nu_{0-\lambda}) (I_{0-\lambda} / I_{0-1}) A_{0-1}$ , where  $\nu_{0-\lambda}$  and  $I_{0-\lambda}$  represent respectively the frequency and intensity corresponding to the respective transition in the emission spectrum.  $A_{0-1}$  is taken as a constant value of  $50 \text{ s}^{-1}$ . Inverse of the experimentally measured lifetime ( $1/\tau_{\text{measured}}$ ) gives the sum of non-radiative and radiative decay rates ( $A_{\text{rad}} + A_{\text{nrad}}$ ).

**Change is asymmetry Ratio:**

In the undoped sample each  $Y^{3+}$  is having 7 oxygen atoms as near neighbours and  $5Y^{3+}$  and  $6Ge^{4+}$  as next nearest neighbours (NNN). With increasing  $Eu^{3+}$  doping,  $Y^{3+}$  ions existing as next nearest neighbors around a central (focal)  $Eu^{3+}$  will be replaced with another  $Eu^{3+}$  species. As a result, there will be six possible different configurations/structural units ( $Eu^{3+}$  distribution and surrounding arrangements in the lattice) with (n)  $Y^{3+}$  ions and (5-n)  $Eu^{3+}$  ions as next nearest neighbours. All these six configurations also have  $6Ge^{4+}$  as next nearest neighbours. The relative concentrations of each of the six possible structural units existing in the solid solution with formula  $(Y_{1-x}Eu_x)_2Ge_2O_7$  can be evaluated, assuming a binomial distribution based on Equation 2 as given below<sup>12-14</sup>.

$${}^{5-n}P_n = {}^5C_n [x]^n [1-x]^{5-n} \dots\dots\dots(\text{Eqn. 1}).$$

where “x” is the fraction of  $Eu^{3+}$  species in the solid solution (sample) and  ${}^{5-n}P_n$  represents probability of  $Eu^{3+}$  structural units having “n” number of  $Y^{3+}$  and 5-n number of  $Eu^{3+}$  as next nearest neighbours. The term  ${}^5C_n$  is given by the following equation (Equation 2).

$${}^5C_n = \frac{5!}{(5-n)! \times n!} \dots\dots\dots(\text{Eqn. 2})$$

The calculated values of relative concentrations of different  $Eu^{3+}$  structural units are given in Table S1. It may be noted that structural units with concentration more than 0.2% are only mentioned in Table S1. As expected with increase in  $Eu^{3+}$  concentration, relative concentration of  $Eu^{3+}$  structural units with higher number of  $Eu^{3+}$  as next nearest neighbours increases (Table 1 of main manuscript).

For the samples investigated in the present study, mainly  $\text{Eu}^{3+}$  structural units with  $x=0, 1, 2, 3, 4,$  and  $5 \text{Eu}^{3+}$  along with  $6\text{Ge}^{4+}$  as next nearest neighbours, represented as  $\text{Eu}(5\text{Y},0\text{Eu}, 6\text{Ge}), \text{Eu}(4\text{Y},1\text{Eu}, 6\text{Ge}), \text{Eu}(3\text{Y},2\text{Eu}, 6\text{Ge}), \text{Eu}(2\text{Y},3\text{Eu}, 6\text{Ge}), \text{Eu}(1\text{Y},4\text{Eu}, 6\text{Ge})$  and  $\text{Eu}(0\text{Y},5\text{Eu}, 6\text{Ge})$  with varying concentrations are present as can be seen from Table S1. The main  $\text{Eu}^{3+}$  configurations existing in  $\text{Eu}^{3+}$  doped samples are primarily  $\text{Eu}(5\text{Y},0\text{Eu}, 6\text{Ge}), \text{Eu}(4\text{Y},1\text{Eu}, 6\text{Ge}), \text{Eu}(3\text{Y},2\text{Eu}, 6\text{Ge}),$  and variation in the relative concentration is responsible for the variation in the values of asymmetric ratios

**Table-S1:** Cell parameters obtained via Rietveld Refinement

| samples                                               | a       | b       | c        |
|-------------------------------------------------------|---------|---------|----------|
| Undoped Y <sub>2</sub> Ge <sub>2</sub> O <sub>7</sub> | 6.80150 | 6.80150 | 12.36905 |
| Y <sub>2</sub> Ge <sub>2</sub> O <sub>7</sub> :2Eu    | 6.80323 | 6.80323 | 12.37340 |
| Y <sub>2</sub> Ge <sub>2</sub> O <sub>7</sub> :4Eu    | 6.80480 | 6.80480 | 12.37632 |
| Y <sub>2</sub> Ge <sub>2</sub> O <sub>7</sub> :6Eu    | 6.80691 | 6.80691 | 12.38016 |
| Y <sub>2</sub> Ge <sub>2</sub> O <sub>7</sub> :8Eu    | 6.80802 | 6.80802 | 12.38212 |
| Y <sub>2</sub> Ge <sub>2</sub> O <sub>7</sub> :10Eu   | 6.80984 | 6.80984 | 12.38632 |

**Table S2. Relative percentages of different Eu<sup>3+</sup> structural units with varying number of Y<sup>3+</sup> and Eu<sup>3+</sup> as next nearest neighbours around a central (focal) Eu<sup>3+</sup> ions in Y<sub>2</sub>Ge<sub>2</sub>O<sub>7</sub> lattice. Structural units with concentrations**

| Composition | Eu<br>(5Y,0Eu,<br>6Ge) (%) | Eu<br>(4Y,1Eu,<br>6Ge) (%) | Eu<br>(3Y,2Eu,<br>6Ge) (%) | Eu<br>(2Y,3Eu,<br>6Ge) (%) | Eu<br>(1Y,4Eu,<br>6Ge) (%) | Eu<br>(0Y,5Eu,<br>6Ge) (%) |
|-------------|----------------------------|----------------------------|----------------------------|----------------------------|----------------------------|----------------------------|
| x = 0.00    | 100                        | 0                          | 0                          | -                          | -                          | -                          |
| x = 0.02    | 90.4                       | 9.2                        | 0.4                        | -                          | -                          | -                          |
| x = 0.04    | 81.6                       | 17.0                       | 1.4                        | -                          | -                          | -                          |
| x = 0.06    | 73.4                       | 23.4                       | 3.0                        | 0.20                       | -                          | -                          |
| x = 0.08    | 65.9                       | 28.7                       | 5.0                        | 0.40                       | -                          | -                          |
| x = 0.10    | 59.0                       | 32.8                       | 7.3                        | 0.9                        | -                          | -                          |

**REFERENCES (cited in supporting information document)**

- (1). Kresse, G.;Furthmuller, J. Efficient iterative schemes for ab initio total-energy calculations using a plane-wave basis set.*Phys. Rev. B.* 1996, 54, 11169-86.
- (2). Vanderbilt, D.; Soft self-consistent pseudopotentials in generalized eigenvalue formalism *Phys. Rev. B.* 1990, 41, 7892-95.
- (3). Blochl, P. E.; Projector augmented-wave method *Phys. Rev. B.* 1994, 50, 17953-79.
- (4). Kresse, G.;Joubert, J. From ultrasoftpseudopotentials to the projector augmented-wave method, *Phys. Rev. B.* 1999, 59, 1758-75
- (5). Perdew, J. P.;Chevary, J. A.;Vosko, S. K.; Jackson, K. A.; Pederson, M. R.; Singh, D. J.;Fiolhias, C. Atoms, molecules, solids, and surfaces: Applications of the generalized gradient approximation for exchange and correlation *Phys. Rev. B.* 1992; 46: 6671-87
- (6). Redhammer, G.J.; Roth, G.; Amthauer, G. 'Yttrium pyrogermanate, Y<sub>2</sub>Ge<sub>2</sub>O<sub>7</sub>*ActaCryst.* 2007, C63, i93-i95.
- (7). C.A. Kodaira, H.F. Brito, O. L. Malta and O. A. Serra, *J. Lumin.* 2003, **101**, 11.
- (8). D. Hreniak, W. Streck, J. Amami, Y. Guyot, G. Boulon, C. Goutaudier and R. Pazik, *J. Alloys. Compd.*, 2004, **380**, 348.

- (9). L. M. Dennis and A. W. Laubengayer, *J. Phys. Chem.*, 1926, **30**, 1510.
- (10). P. Dorenbos, in: W. M. Yen, S. Shionoya, H. Yamamoto (Eds.), *Phosphor hand book*, CRC press, Boca Raton, 2007, 142.
- (11). W. T. Carnall, H. Crosswhite, H. M. Crosswhite, *Energy Structure and Transition Probabilities of the Trivalent Lanthanides in LaF<sub>3</sub>*, Argonne National Laboratory Report, USA, 1977
- (12). S.K. Kulshreshtha, R. Sasikala, V. Sudarsan, Non-random distribution of cations in Sn<sub>1-x</sub>Ti<sub>x</sub>O<sub>2</sub> (0.0 ≤ x ≤ 1.0): A <sup>119</sup>Sn MAS NMR study, *J. Mater. Chem.* **11** (2001) 930–935.
- (13). S.K. Kulshreshtha, O.D. Jayakumar, V. Sudarsan, Non-random cation distribution in hexagonal Al<sub>0.5</sub>Ga<sub>0.5</sub>PO<sub>4</sub>, *J. Solid State Chem.* **183** (2010) 1071–1074.
- (14). Dinesh K. Patel, K. G. Girija, Boddu S. Naidu, B. Vishwanadh, Farheen N. Sayed, R.K. Vatsa, V. Sudarsan, S. K. Kulshreshtha, *J. Alloys Compd.* **884** (2021) 161021 1-10
